# Supplementary material for: Embodied Cognition in Meditation, Yoga, and Ethics—An Experimental Single-Case Study on the Differential Effects of Four Mind–Body Treatments
Source: MDPI journal article supplement (doi:10.3390/ijerph191811734), 2022-09-17
Supplement: s1 [file s1]

## **Supplementary Material**

Embodied Cognition in Meditation, Yoga, and Ethics

An Experimental Single-Case Study on Differential Effects of Four Treatments

**Table S1**

*Body Awareness Questionnaire Employed in the Present Study With Questionnaires They Were Derived From*

- 
1. I was aware of a cycle in my activity level throughout the day. (BAQ)
  2. I knew immediately when my mouth or throat got dry. (PBCS)
  3. I noticed changes in my breathing, such as whether it slowed down or sped up. (MAIA)
  4. I noticed where in my body I was comfortable. (MAIA)
  5. I was sensitive of internal bodily tensions. (PBCS)
  6. I felt my heart beating. (PBCS)
  7. I was quick to sense the hunger contractions of my stomach. (PBCS)
  8. I was aware of changes in my body temperature. (PBSC)
  9. I noticed differences in the way my body reacted to various foods. (BAQ)
  10. I noticed how my body changed when I was feeling emotions. (MAIA)
  11. When I was walking, I deliberately noticed the sensations of my body moving. (FFMQ)
- 

*Note.* BAQ = Body Awareness Questionnaire; FFMQ = Five Facets of Mindfulness Questionnaire; MAIA = Multidimensional Assessment of Interoceptive Awareness; PBSC = Private Body Consciousness Scale.

**Table S2**

*Shortened Difficulties in Emotion Regulation Scale Employed in the Present Study*

- 
1. When I'm upset, I feel guilty for feeling that way.
  2. When I'm upset, I feel ashamed with myself for feeling that way.
  3. When I'm upset, I have difficulty concentrating.
  4. When I'm upset, I have difficulty focusing on other things.
  5. When I'm upset, I lose control over my behaviors.
  6. When I'm upset, I have difficulty controlling my behaviors.
  7. I am attentive to my feelings. (r)
  8. I pay attention to how I feel. (r)
  9. When I'm upset, I believe that I'll end up feeling very depressed.
  10. When I'm upset, I believe that I will remain that way for a long time.
  11. I have difficulty making sense out of my feelings.
  12. I have no idea how I am feeling.
-

**Table S3**

*Shortened Self-Compassion Scale Employed in the Present Study*

---

|     |                                                                                                                   |
|-----|-------------------------------------------------------------------------------------------------------------------|
| 1.  | When I'm going through a very hard time, I give myself the caring and tenderness I need.                          |
| 2.  | I'm kind to myself when I'm experiencing suffering.                                                               |
| 3.  | When I see aspects of myself that I don't like, I get down on myself.                                             |
| 4.  | I can be a bit cold-hearted towards myself when I'm experiencing suffering.                                       |
| 5.  | When I feel inadequate in some way, I try to remind myself that feelings of inadequacy are shared by most people. |
| 6.  | I try to see my failings as part of the human condition.                                                          |
| 7.  | When I fail at something that's important to me I tend to feel alone in my failure.                               |
| 8.  | When I think about my inadequacies it tends to make me feel more separate and cut off from the rest of the world. |
| 9.  | When I fail at something important to me I try to keep things in perspective.                                     |
| 10. | When something painful happens I try to take a balanced view of the situation.                                    |
| 11. | When I'm feeling down I tend to obsess and fixate on everything that's wrong.                                     |
| 12. | When I fail at something important to me I become consumed by feelings of inadequacy.                             |

---

**Table S4**

*Mean Body Awareness Scores With Standard Deviations for Baseline (A) and Treatment (B) Phases, and Tau-U Estimates With Respective Significance Levels and Type of Tau-U for Each Participant*

| Case | Mean A | Mean B | SD A | SD B | Tau-U         | Tau-U Significance | Tau-U Type                  |
|------|--------|--------|------|------|---------------|--------------------|-----------------------------|
| 1    | 4.70   | 4.93   | 0.19 | 0.14 | <b>0.667</b>  | .045               | A vs. B - Trend A           |
| 2    | 3.14   | 3.68   | 0.19 | 0.25 | <b>0.562</b>  | .001               | A vs. B - Trend A + Trend B |
| 3    | 2.53   | 2.36   | 0.41 | 0.18 | -0.111        | .719               | A vs. B - Trend A           |
| 4    | 3.82   | 3.79   | 0.13 | 0.32 | -0.370        | .114               | A vs. B + Trend B           |
| 5    | 3.44   | 2.90   | 0.54 | 0.34 | <b>-0.564</b> | .007               | A vs. B - Trend A + Trend B |
| 6    | 1.92   | 2.26   | 0.37 | 0.25 | <b>0.496</b>  | .001               | A vs. B + Trend B           |
| 7    | 4.11   | 4.09   | n.a. | 0.30 | -0.067        | .717               | A vs. B + Trend B           |
| 8    | 3.05   | 3.50   | 0.19 | 0.27 | -0.074        | .753               | A vs. B + Trend B           |
| 9    | 3.25   | 3.67   | 0.20 | 0.35 | <b>0.624</b>  | .000               | A vs. B + Trend B           |
| 10   | 3.89   | 4.30   | 0.35 | 0.21 | <b>0.703</b>  | .033               | A vs. B                     |
| 11   | 2.03   | 2.63   | 0.47 | 0.48 | <b>0.632</b>  | .000               | A vs. B + Trend B           |
| 12   | 2.80   | 3.02   | 0.40 | 0.39 | <b>0.426</b>  | .008               | A vs. B - Trend A + Trend B |
| 13   | 3.11   | 3.63   | 0.35 | 0.31 | <b>0.699</b>  | .000               | A vs. B - Trend A + Trend B |
| 14   | 4.09   | 3.84   | n.a. | 0.44 | <b>0.400</b>  | .029               | A vs. B + Trend B           |
| 15   | 3.89   | 4.69   | 0.34 | 0.16 | <b>0.867</b>  | .014               | A vs. B - Trend A           |
| 16   | 3.33   | 3.63   | 0.18 | 0.25 | <b>0.625</b>  | .027               | A vs. B                     |
| 17   | 2.89   | 2.72   | 0.38 | 0.21 | -0.284        | .294               | A vs. B - Trend A           |
| 18   | 2.03   | 1.92   | 0.54 | 0.38 | 0.256         | .124               | A vs. B + Trend B           |
| 19   | 3.07   | 3.39   | 0.05 | 0.36 | <b>0.672</b>  | .029               | A vs. B - Trend A           |
| 20   | 4.27   | 3.48   | n.a. | 0.28 | <b>-0.333</b> | .070               | A vs. B + Trend B           |
| 21   | 2.51   | 2.48   | 0.36 | 0.28 | 0.111         | .618               | A vs. B + Trend B           |
| 22   | 2.29   | 3.22   | 0.19 | 0.52 | <b>0.847</b>  | .001               | A vs. B - Trend A           |
| 23   | 4.00   | 4.24   | 0.13 | 0.45 | <b>0.508</b>  | .001               | A vs. B + Trend B           |
| 24   | 3.58   | 3.96   | 0.31 | 0.21 | <b>0.589</b>  | .000               | A vs. B - Trend A + Trend B |

SM: Embodied cognition in meditation, yoga, and ethics

|    |      |      |      |      |               |      |                                |
|----|------|------|------|------|---------------|------|--------------------------------|
| 25 | 3.73 | 3.89 | 0.17 | 0.22 | <b>0.481</b>  | .027 | A vs. B + Trend B              |
| 26 | 3.21 | 3.69 | 0.05 | 0.41 | <b>0.667</b>  | .083 | A vs. B                        |
| 27 | 3.61 | 4.16 | 0.41 | 0.22 | <b>0.444</b>  | .007 | A vs. B - Trend A +<br>Trend B |
| 28 | 2.30 | 3.91 | n.a. | 0.49 | <b>0.808</b>  | .000 | A vs. B + Trend B              |
| 29 | 2.50 | 1.59 | n.a. | 0.44 | <b>-0.578</b> | .020 | A vs. B + Trend B              |
| 30 | 3.40 | 3.69 | 0.44 | 0.36 | 0.284         | .350 | A vs. B - Trend A              |
| 31 | 3.90 | 3.49 | 0.22 | 0.57 | <b>-0.559</b> | .001 | A vs. B + Trend B              |
| 32 | 3.15 | 3.64 | 0.53 | 0.39 | <b>0.552</b>  | .073 | A vs. B - Trend A              |
| 33 | 3.30 | 4.24 | n.a. | 0.54 | <b>0.604</b>  | .003 | A vs. B + Trend B              |
| 34 | 3.00 | 3.36 | 0.13 | 0.18 | <b>0.462</b>  | .038 | A vs. B + Trend B              |
| 35 | 3.00 | 2.91 | n.a. | 0.29 | -0.309        | .186 | A vs. B + Trend B              |
| 36 | 2.85 | 3.04 | 0.46 | 0.43 | 0.293         | .242 | A vs. B - Trend A              |
| 37 | 3.89 | 4.00 | 0.14 | 0.21 | 0.425         | .229 | A vs. B                        |
| 38 | 3.39 | 3.57 | 0.30 | 0.19 | 0.375         | .185 | A vs. B                        |
| 39 | 3.79 | 3.58 | 0.57 | 0.37 | -0.400        | .117 | A vs. B - Trend A              |
| 40 | 2.79 | 2.60 | 0.11 | 0.18 | <b>-0.591</b> | .051 | A vs. B - Trend A              |
| 41 | 2.80 | 3.09 | 0.03 | 0.17 | <b>0.467</b>  | .008 | A vs. B + Trend B              |
| 42 | 2.98 | 3.00 | 0.75 | 0.63 | 0.129         | .677 | A vs. B                        |

---

*Note.* Effect sizes significant on  $\alpha < 0.10$  level were printed in bold type; n.a. = not available.

**Table S5**

*Regression Model for Tau-U Body Awareness Estimates as Dependent Variable and Condition, Total Practice Time, Age, Gender, Occupation, and Baseline Length as Predictors (df = 33)*

| Variable            | <i>b</i> | $\beta$ | <i>SE</i> | <i>t</i> | <i>p</i> |
|---------------------|----------|---------|-----------|----------|----------|
| (Intercept)         | 0.16     | 0.00    | 0.45      | 0.36     | .719     |
| ME condition        | 0.04     | 0.04    | 0.23      | 0.19     | .426     |
| MY condition        | 0.12     | 0.11    | 0.22      | 0.54     | .298     |
| MYE condition       | -0.15    | -0.15   | 0.28      | -0.54    | .296     |
| Total practice time | 0.00     | 0.23    | 0.00      | 1.03     | .313     |
| Age                 | -0.01    | -0.19   | 0.01      | -0.81    | .422     |
| Gender              | -0.04    | -0.04   | 0.20      | -0.22    | .826     |
| Occupation          | 0.38     | 0.30    | 0.30      | 1.25     | .221     |
| Baseline length     | 0.01     | 0.11    | 0.01      | 0.63     | .535     |

**Table S6**

*Regression Model for Tau-U Body Awareness Estimates as Dependent Variable and Component, Total Practice Time, Age, Gender, Occupation, and Baseline Length as Predictors (df = 34)*

| Variable                   | <i>b</i> | $\beta$ | <i>SE</i> | <i>t</i> | <i>p</i> |
|----------------------------|----------|---------|-----------|----------|----------|
| (Intercept)                | 0.32     | 0.00    | 0.43      | 0.74     | .463     |
| Ethical education (yes/no) | -0.11    | -0.12   | 0.18      | -0.60    | .278     |
| Physical yoga (yes/no)     | -0.02    | -0.02   | 0.18      | -0.10    | .460     |
| Total practice time        | 0.00     | 0.19    | 0.00      | 0.87     | .391     |
| Age                        | -0.01    | -0.24   | 0.01      | -1.03    | .311     |
| Gender                     | -0.03    | -0.02   | 0.20      | -0.13    | .894     |
| Occupation                 | 0.45     | 0.36    | 0.29      | 1.55     | .131     |
| Baseline length            | 0.01     | 0.10    | 0.01      | 0.61     | .543     |

**Table S7**

*Multilevel Regression Estimates for Body Awareness Scores as Dependent Variable and Time, Condition, Total Practice Time, Age, Gender, Occupation, and Baseline Length as Predictors*

| Variable             | $\beta$ | <i>SE</i> | <i>df</i> | <i>t</i> | <i>p</i> |
|----------------------|---------|-----------|-----------|----------|----------|
| Time                 | 0.15    | 0.05      | 677       | 3.21     | .001     |
| ME condition         | -0.11   | 0.21      | 33        | -0.52    | .605     |
| MY condition         | 0.02    | 0.19      | 33        | 0.09     | .927     |
| MYE condition        | -0.03   | 0.24      | 33        | -0.14    | .891     |
| Total practice time  | -0.08   | 0.19      | 33        | -0.45    | .655     |
| Age                  | 0.14    | 0.19      | 33        | 0.76     | .451     |
| Gender               | -0.01   | 0.14      | 33        | -0.08    | .936     |
| Occupation           | -0.15   | 0.20      | 33        | -0.74    | .462     |
| Baseline Length      | -0.12   | 0.14      | 33        | -0.81    | .426     |
| Time * ME condition  | 0.04    | 0.06      | 677       | 0.71     | .240     |
| Time * MY condition  | 0.07    | 0.06      | 677       | 1.13     | .128     |
| Time * MYE condition | 0.02    | 0.06      | 677       | 0.36     | .358     |

**Table S8**

*Multilevel Regression Estimates for Body Awareness Scores as Dependent Variable and Time, Component, Total Practice Time, Age, Gender, Occupation, and Baseline Length as Predictors*

| Variable                   | $\beta$ | <i>SE</i> | <i>df</i> | <i>t</i> | <i>p</i> |
|----------------------------|---------|-----------|-----------|----------|----------|
| Time                       | 0.15    | 0.05      | 678       | 3.17     | .001     |
| Ethical education (yes/no) | -0.10   | 0.18      | 34        | -0.54    | .590     |
| Physical yoga (yes/no)     | 0.04    | 0.18      | 34        | 0.21     | .833     |
| Total practice time        | -0.06   | 0.18      | 34        | -0.34    | .734     |
| Age                        | 0.16    | 0.18      | 34        | 0.87     | .388     |
| Gender                     | -0.02   | 0.14      | 34        | -0.15    | .883     |
| Occupation                 | -0.17   | 0.19      | 34        | -0.90    | .376     |
| Baseline Length            | -0.12   | 0.14      | 34        | -0.81    | .422     |
| Time * Ethical education   | 0.00    | 0.05      | 678       | -0.06    | .476     |
| Time * Physical yoga       | 0.02    | 0.05      | 678       | 0.53     | .299     |



**Table S9**

*Mean Difficulties with Emotion Regulation Scores With Standard Deviations for Baseline (A) and Treatment (B) Phases, and Tau-U Estimates With Respective Significance Levels and Type of Tau-U for Each Participant*

| Case | Mean A  | Mean B | SDA  | SDB  | Tau-U         | Tau-U<br>Significance | Tau-U Type                     |
|------|---------|--------|------|------|---------------|-----------------------|--------------------------------|
| 1    | 2.54    | 1.89   | 0.29 | 0.43 | <b>-0.647</b> | .152                  | A vs. B - Trend A              |
| 2    | 2.33    | 2.00   | 0.12 | 0.24 | <b>-0.500</b> | .042                  | A vs. B + Trend B              |
| 3    | 3.75    | 3.33   | n.a. | 0.20 | -0.286        | .362                  | A vs. B + Trend B              |
| 4    | 1.50    | 1.85   | n.a. | 0.31 | 0.414         | .251                  | A vs. B + Trend B              |
| 5    | 1.38    | 1.31   | 0.18 | 0.14 | -0.231        | .603                  | A vs. B - Trend A              |
| 6    | 3.42    | 3.02   | 0.14 | 0.23 | <b>-0.852</b> | .033                  | A vs. B                        |
| 7    | missing |        |      |      |               |                       |                                |
| 8    | 3.42    | 3.03   | n.a. | 0.19 | -0.476        | .129                  | A vs. B + Trend B              |
| 9    | 2.79    | 2.07   | 0.53 | 0.38 | <b>-0.800</b> | .001                  | A vs. B - Trend A +<br>Trend B |
| 10   | 1.71    | 1.75   | 0.06 | 0.25 | 0.023         | .927                  | A vs. B + Trend B              |
| 11   | 2.00    | 1.66   | n.a. | 0.10 | 0.056         | .831                  | A vs. B + Trend B              |
| 12   | 2.39    | 1.98   | 0.35 | 0.42 | <b>-0.709</b> | .002                  | A vs. B - Trend A +<br>Trend B |
| 13   | 2.08    | 1.93   | 0.12 | 0.20 | <b>-0.523</b> | .037                  | A vs. B + Trend B              |
| 14   | 2.50    | 1.81   | n.a. | 0.57 | <b>-0.905</b> | .003                  | A vs. B + Trend B              |
| 15   | 1.08    | 1.17   | n.a. | 0.11 | -0.393        | .111                  | A vs. B + Trend B              |
| 16   | 1.75    | 1.81   | 0.33 | 0.18 | 0.200         | .580                  | A vs. B - Trend A              |
| 17   | 3.06    | 2.84   | 0.34 | 0.25 | <b>-0.524</b> | .022                  | A vs. B + Trend B              |
| 18   | 1.81    | 1.87   | 0.46 | 0.37 | -0.111        | .649                  | A vs. B - Trend A +<br>Trend B |
| 19   | 2.71    | 2.21   | 0.18 | 0.51 | <b>-0.765</b> | .088                  | A vs. B - Trend A              |
| 20   | 2.25    | 2.05   | n.a. | 0.29 | <b>-0.500</b> | .083                  | A vs. B + Trend B              |
| 21   | 2.96    | 2.67   | 0.29 | 0.20 | <b>-0.667</b> | .163                  | A vs. B - Trend A              |
| 22   | 3.61    | 2.91   | 0.17 | 0.25 | <b>-0.697</b> | .001                  | A vs. B - Trend A +<br>Trend B |
| 23   | 2.67    | 1.81   | n.a. | 0.46 | <b>-0.822</b> | .001                  | A vs. B + Trend B              |
| 24   | 2.25    | 2.14   | 0.46 | 0.27 | <b>-0.379</b> | .083                  | A vs. B - Trend A +<br>Trend B |

SM: Embodied cognition in meditation, yoga, and ethics

|    |         |      |      |      |               |      |                                |
|----|---------|------|------|------|---------------|------|--------------------------------|
| 25 | 3.00    | 2.47 | 0.24 | 0.18 | <b>-0.571</b> | .044 | A vs. B - Trend A +<br>Trend B |
| 26 | 2.54    | 2.13 | 0.18 | 0.33 | <b>-0.714</b> | .024 | A vs. B - Trend A +<br>Trend B |
| 27 | 2.33    | 2.27 | 0.35 | 0.38 | <b>-0.422</b> | .083 | A vs. B - Trend A +<br>Trend B |
| 28 | missing |      |      |      |               |      |                                |
| 29 | missing |      |      |      |               |      |                                |
| 30 | 2.67    | 2.69 | 0.59 | 0.33 | 0.200         | .382 | A vs. B - Trend A +<br>Trend B |
| 31 | 1.78    | 1.65 | 0.38 | 0.37 | -0.327        | .160 | A vs. B - Trend A +<br>Trend B |
| 32 | 3.46    | 3.11 | 0.29 | 0.46 | <b>-0.500</b> | .083 | A vs. B - Trend A +<br>Trend B |
| 33 | 3.92    | 2.86 | n.a. | 0.62 | <b>-0.750</b> | .009 | A vs. B + Trend B              |
| 34 | 2.58    | 2.67 | n.a. | 0.20 | -0.200        | .602 | A vs. B + Trend B              |
| 35 | 2.33    | 2.27 | n.a. | 0.17 | <b>-0.700</b> | .077 | A vs. B + Trend B              |
| 36 | 2.22    | 1.83 | 0.32 | 0.34 | -0.433        | .234 | A vs. B - Trend A              |
| 37 | 2.83    | 2.30 | 0.12 | 0.41 | <b>-0.611</b> | .020 | A vs. B - Trend A +<br>Trend B |
| 38 | 1.86    | 2.14 | 0.21 | 0.28 | 0.567         | .118 | A vs. B - Trend A              |
| 39 | 2.11    | 2.30 | 0.27 | 0.67 | 0.080         | .798 | A vs. B + Trend B              |
| 40 | 1.42    | 1.44 | 0.00 | 0.18 | -0.318        | .193 | A vs. B + Trend B              |
| 41 | 3.42    | 2.73 | n.a. | 0.33 | <b>-0.528</b> | .046 | A vs. B + Trend B              |
| 42 | 2.44    | 2.30 | 0.29 | 0.19 | -0.333        | .171 | A vs. B - Trend A +<br>Trend B |

---

*Note.* Effect sizes significant on  $\alpha < 0.10$  level were printed in bold type; n.a. = not available.

**Table S10**

*Regression Model for Tau-U Difficulties with Emotion Regulation Estimates as Dependent Variable and Condition, Total Practice Time, Age, Gender, Occupation, and Baseline Length as Predictors (df = 30)*

| Variable            | <i>b</i> | $\beta$ | <i>SE</i> | <i>t</i> | <i>p</i> |
|---------------------|----------|---------|-----------|----------|----------|
| (Intercept)         | -0.98    | 0.00    | 0.40      | -2.47    | .019     |
| ME condition        | -0.03    | -0.03   | 0.19      | -0.13    | .448     |
| MY condition        | -0.16    | -0.19   | 0.20      | -0.81    | .211     |
| MYE condition       | -0.01    | -0.01   | 0.24      | -0.05    | .482     |
| Total practice time | 0.00     | 0.09    | 0.00      | 0.38     | .706     |
| Age                 | 0.01     | 0.33    | 0.01      | 1.27     | .212     |
| Gender              | -0.06    | -0.07   | 0.16      | -0.37    | .714     |
| Occupation          | -0.17    | -0.18   | 0.26      | -0.67    | .511     |
| Baseline length     | 0.01     | 0.22    | 0.01      | 1.21     | .237     |

**Table S11**

*Regression Model for Tau-U Difficulties with Emotion Regulation Estimates as Dependent Variable and Component, Total Practice Time, Age, Gender, Occupation, and Baseline Length as Predictors (df = 31)*

| Variable                   | <i>b</i> | $\beta$ | <i>SE</i> | <i>t</i> | <i>p</i> |
|----------------------------|----------|---------|-----------|----------|----------|
| (Intercept)                | -1.04    | 0.00    | 0.38      | -2.72    | .011     |
| Ethical education (yes/no) | 0.06     | 0.08    | 0.15      | 0.38     | .353     |
| Physical yoga (yes/no)     | -0.08    | -0.11   | 0.16      | -0.48    | .316     |
| Total practice time        | 0.00     | 0.11    | 0.00      | 0.46     | .649     |
| Age                        | 0.01     | 0.36    | 0.01      | 1.38     | .178     |
| Gender                     | -0.07    | -0.08   | 0.16      | -0.43    | .670     |
| Occupation                 | -0.21    | -0.21   | 0.25      | -0.83    | .415     |
| Baseline length            | 0.01     | 0.21    | 0.01      | 1.17     | .250     |

**Table S12**

*Multilevel Regression Estimates for Difficulties with Emotion Regulation Scores as Dependent Variable and Time, Condition, Total Practice Time, Age, Gender, Occupation, and Baseline Length as Predictors*

| Variable             | $\beta$ | <i>SE</i> | <i>df</i> | <i>t</i> | <i>p</i> |
|----------------------|---------|-----------|-----------|----------|----------|
| Time                 | -0.26   | 0.05      | 334       | -5.55    | .000     |
| ME condition         | -0.03   | 0.19      | 33        | -0.16    | .870     |
| MY condition         | 0.15    | 0.18      | 33        | 0.84     | .408     |
| MYE condition        | 0.33    | 0.22      | 33        | 1.48     | .148     |
| Total practice time  | -0.33   | 0.17      | 33        | -1.91    | .066     |
| Age                  | 0.00    | 0.17      | 33        | 0.01     | .991     |
| Gender               | -0.21   | 0.13      | 33        | -1.58    | .123     |
| Occupation           | -0.06   | 0.18      | 33        | -0.30    | .762     |
| Baseline Length      | 0.07    | 0.13      | 33        | 0.55     | .586     |
| Time * ME condition  | -0.01   | 0.06      | 334       | -0.17    | .431     |
| Time * MY condition  | -0.07   | 0.06      | 334       | -1.20    | .116     |
| Time * MYE condition | -0.01   | 0.06      | 334       | -0.23    | .408     |

**Table S13**

*Multilevel Regression Estimates for Difficulties with Emotion Regulation Scores as Dependent Variable and Time, Component, Total Practice Time, Age, Gender, Occupation, and Baseline Length as Predictors*

| Variable                   | $\beta$ | <i>SE</i> | <i>df</i> | <i>t</i> | <i>p</i> |
|----------------------------|---------|-----------|-----------|----------|----------|
| Time                       | -0.26   | 0.05      | 335       | -5.59    | .000     |
| Ethical education (yes/no) | 0.08    | 0.16      | 34        | 0.48     | .632     |
| Physical yoga (yes/no)     | 0.27    | 0.16      | 34        | 1.66     | .107     |
| Total practice time        | -0.30   | 0.17      | 34        | -1.73    | .092     |
| Age                        | 0.03    | 0.17      | 34        | 0.20     | .843     |
| Gender                     | -0.23   | 0.13      | 34        | -1.71    | .096     |
| Occupation                 | -0.10   | 0.18      | 34        | -0.59    | .560     |
| Baseline Length            | 0.07    | 0.13      | 34        | 0.52     | .606     |
| Time * Ethical education   | 0.03    | 0.05      | 335       | 0.59     | .278     |
| Time * Physical yoga       | -0.04   | 0.05      | 335       | -0.86    | .196     |

**Table S14**

*Mean Valence and Arousal Scores With Standard Deviations for Baseline (A) and Treatment (B) Phases, and Tau-U Estimates and Categorized Affective Response for Each Participant*

| Case | Valence |        |               | Arousal |        |               | Response       |
|------|---------|--------|---------------|---------|--------|---------------|----------------|
|      | Mean A  | Mean B | Tau-U         | Mean A  | Mean B | Tau-U         |                |
| 1    | 4.83    | 5.38   | 0.175         | 5.58    | 6.23   | 0.229         | more energetic |
| 2    | 3.93    | 4.00   | <b>-0.197</b> | 6.21    | 6.00   | -0.093        | more stressed  |
| 3    | 4.29    | 4.09   | -0.091        | 6.12    | 6.41   | 0.123         | more stressed  |
| 4    | 5.14    | 3.91   | <b>-0.392</b> | 8.43    | 8.16   | -0.241        | more stressed  |
| 5    | 4.70    | 4.29   | -0.250        | 6.70    | 6.76   | 0.035         | more stressed  |
| 6    | 4.14    | 4.17   | <b>0.175</b>  | 7.00    | 6.64   | -0.117        | more energetic |
| 7    | 3.60    | 3.34   | <b>-0.206</b> | 6.60    | 6.60   | 0.045         | more stressed  |
| 8    | 2.67    | 3.43   | 0.337         | 6.17    | 6.46   | 0.097         | less stressed  |
| 9    | 4.35    | 3.96   | -0.134        | 5.41    | 6.41   | <b>0.397</b>  | more stressed  |
| 10   | 5.07    | 4.80   | -0.142        | 6.21    | 6.48   | 0.097         | no change      |
| 11   | 4.00    | 3.95   | -0.011        | 5.71    | 6.49   | <b>0.474</b>  | more stressed  |
| 12   | 4.06    | 4.70   | 0.245         | 5.94    | 6.30   | <b>0.229</b>  | more energetic |
| 13   | 3.62    | 4.37   | <b>0.373</b>  | 5.92    | 6.00   | 0.054         | more energetic |
| 14   | 4.67    | 4.63   | 0.129         | 6.50    | 7.02   | <b>0.184</b>  | more energetic |
| 15   | 6.27    | 6.84   | <b>0.360</b>  | 4.91    | 4.34   | <b>-0.332</b> | more relaxed   |
| 16   | 4.24    | 4.44   | 0.082         | 6.52    | 6.04   | <b>-0.253</b> | more relaxed   |
| 17   | 4.20    | 3.93   | -0.188        | 6.55    | 6.04   | -0.213        | less stressed  |
| 18   | 4.43    | 5.50   | <b>0.334</b>  | 6.48    | 5.34   | <b>-0.268</b> | more relaxed   |
| 19   | 4.69    | 4.02   | <b>-0.220</b> | 5.92    | 6.30   | 0.133         | more stressed  |
| 20   | 4.20    | 4.73   | 0.103         | 6.00    | 6.49   | 0.111         | more energetic |
| 21   | 3.92    | 4.00   | -0.156        | 6.46    | 6.83   | -0.137        | more stressed  |
| 22   | 4.00    | 3.96   | -0.046        | 6.53    | 6.71   | 0.006         | no change      |
| 23   | 4.71    | 4.46   | -0.138        | 7.00    | 7.03   | 0.002         | no change      |
| 24   | 4.47    | 4.28   | -0.115        | 6.88    | 6.70   | -0.073        | no change      |
| 25   | 3.83    | 3.81   | -0.076        | 7.06    | 6.78   | -0.120        | less stressed  |
| 26   | 3.85    | 4.35   | 0.260         | 7.23    | 6.53   | <b>-0.346</b> | more energetic |
| 27   | 4.50    | 4.61   | 0.038         | 7.25    | 6.39   | <b>-0.262</b> | more relaxed   |
| 28   | 5.00    | 4.13   | -0.211        | 6.00    | 6.06   | 0.000         | more energetic |

|    |      |      |               |      |      |               |                |
|----|------|------|---------------|------|------|---------------|----------------|
| 29 | 3.40 | 3.89 | 0.068         | 5.80 | 6.11 | 0.177         | no change      |
| 30 | 4.54 | 5.11 | 0.186         | 6.23 | 6.59 | 0.177         | more energetic |
| 31 | 4.38 | 4.19 | 0.071         | 6.81 | 7.00 | -0.032        | no change      |
| 32 | 3.86 | 3.85 | <b>-0.189</b> | 6.14 | 6.92 | <b>0.357</b>  | more stressed  |
| 33 | 4.40 | 4.86 | 0.115         | 7.00 | 6.82 | -0.121        | more relaxed   |
| 34 | 3.55 | 4.44 | 0.256         | 6.82 | 6.56 | -0.119        | more energetic |
| 35 | 3.83 | 4.24 | 0.162         | 7.00 | 6.50 | -0.272        | more energetic |
| 36 | 4.55 | 4.89 | -0.025        | 6.50 | 6.84 | 0.152         | more energetic |
| 37 | 4.45 | 4.54 | 0.040         | 6.09 | 6.64 | 0.209         | more energetic |
| 38 | 5.00 | 4.12 | <b>-0.253</b> | 6.90 | 7.82 | <b>0.379</b>  | more stressed  |
| 39 | 4.16 | 3.67 | -0.205        | 7.42 | 6.59 | <b>-0.300</b> | more stressed  |
| 40 | 5.64 | 5.52 | -0.091        | 6.79 | 6.22 | -0.247        | more relaxed   |
| 41 | 4.14 | 4.13 | 0.027         | 5.71 | 6.38 | 0.268         | more energetic |
| 42 | 3.76 | 4.64 | 0.178         | 6.35 | 6.06 | -0.092        | more relaxed   |

*Note.* Effect sizes significant on  $\alpha < 0.10$  level were printed in bold type.

**Table S15**

*Regression Model for Tau-U Valence Estimates as Dependent Variable and Condition, Total Practice Time, Age, Gender, Occupation, and Baseline Length as Predictors (df = 33)*

| Variable            | <i>b</i> | $\beta$ | <i>SE</i> | <i>t</i> | <i>p</i> |
|---------------------|----------|---------|-----------|----------|----------|
| (Intercept)         | -0.06    | 0.00    | 0.20      | -0.28    | .780     |
| ME condition        | 0.18     | 0.41    | 0.10      | 1.80     | .041     |
| MY condition        | 0.08     | 0.18    | 0.10      | 0.82     | .208     |
| MYE condition       | 0.09     | 0.20    | 0.12      | 0.70     | .245     |
| Total practice time | 0.00     | -0.07   | 0.00      | -0.32    | .753     |
| Age                 | 0.00     | 0.05    | 0.01      | 0.21     | .838     |
| Gender              | 0.04     | 0.07    | 0.09      | 0.43     | .670     |
| Occupation          | -0.07    | -0.13   | 0.14      | -0.54    | .594     |
| Baseline length     | 0.00     | -0.04   | 0.01      | -0.24    | .810     |

**Table S16**

*Regression Model for Tau-U Valence Estimates as Dependent Variable and Component, Total Practice Time, Age, Gender, Occupation, and Baseline Length as Predictors (df = 34)*

| Variable                   | <i>b</i> | $\beta$ | <i>SE</i> | <i>t</i> | <i>p</i> |
|----------------------------|----------|---------|-----------|----------|----------|
| (Intercept)                | 0.03     | 0.00    | 0.19      | 0.16     | .875     |
| Ethical education (yes/no) | 0.10     | 0.25    | 0.08      | 1.22     | .230     |
| Physical yoga (yes/no)     | 0.00     | 0.01    | 0.08      | 0.05     | .964     |
| Total practice time        | 0.00     | -0.12   | 0.00      | -0.53    | .601     |
| Age                        | 0.00     | -0.01   | 0.01      | -0.05    | .962     |
| Gender                     | 0.05     | 0.09    | 0.09      | 0.54     | .595     |
| Occupation                 | -0.03    | -0.05   | 0.13      | -0.22    | .828     |
| Baseline length            | 0.00     | -0.04   | 0.01      | -0.26    | .800     |

**Table S17**

*Multilevel Regression Estimates for Valence Scores as Dependent Variable and Time, Condition, Total Practice Time, Age, Gender, Occupation, and Baseline Length as Predictors*

| Variable             | $\beta$ | <i>SE</i> | <i>df</i> | <i>t</i> | <i>p</i> |
|----------------------|---------|-----------|-----------|----------|----------|
| Time                 | 0.00    | 0.03      | 2492.00   | -0.08    | .469     |
| ME condition         | 0.06    | 0.09      | 33.00     | 0.63     | .532     |
| MY condition         | -0.03   | 0.08      | 33.00     | -0.31    | .759     |
| MYE condition        | -0.08   | 0.10      | 33.00     | -0.79    | .432     |
| Total practice time  | 0.17    | 0.08      | 33.00     | 2.23     | .033     |
| Age                  | -0.02   | 0.08      | 33.00     | -0.29    | .774     |
| Gender               | 0.11    | 0.06      | 33.00     | 1.74     | .092     |
| Occupation           | -0.05   | 0.08      | 33.00     | -0.61    | .544     |
| Baseline Length      | 0.00    | 0.06      | 33.00     | 0.08     | .938     |
| Time * ME condition  | 0.08    | 0.03      | 2492.00   | 2.23     | .013     |
| Time * MY condition  | 0.06    | 0.03      | 2492.00   | 1.84     | .033     |
| Time * MYE condition | 0.04    | 0.03      | 2492.00   | 1.23     | .110     |

**Table S18**

*Multilevel Regression Estimates for Valence Scores as Dependent Variable and Time, Component, Total Practice Time, Age, Gender, Occupation, and Baseline Length as Predictors*

| Variable                   | $\beta$ | <i>SE</i> | <i>df</i> | <i>t</i> | <i>p</i> |
|----------------------------|---------|-----------|-----------|----------|----------|
| Time                       | 0.00    | 0.03      | 2493.00   | -0.13    | .448     |
| Ethical education (yes/no) | 0.00    | 0.08      | 34.00     | -0.01    | .995     |
| Physical yoga (yes/no)     | -0.10   | 0.08      | 34.00     | -1.25    | .221     |
| Total practice time        | 0.17    | 0.08      | 34.00     | 2.26     | .031     |
| Age                        | -0.03   | 0.08      | 34.00     | -0.34    | .736     |
| Gender                     | 0.10    | 0.06      | 34.00     | 1.76     | .088     |
| Occupation                 | -0.05   | 0.08      | 34.00     | -0.58    | .566     |
| Baseline Length            | 0.00    | 0.06      | 34.00     | 0.07     | .945     |
| Time * Ethical education   | 0.03    | 0.03      | 2493.00   | 1.08     | .140     |
| Time * Physical yoga       | 0.01    | 0.03      | 2493.00   | 0.52     | .300     |



**Table S19**

*Regression Model for Tau-U Arousal Estimates as Dependent Variable and Condition, Total Practice Time, Age, Gender, Occupation, and Baseline Length as Predictors (df = 32)*

| Variable            | <i>b</i> | $\beta$ | <i>SE</i> | <i>t</i> | <i>p</i> |
|---------------------|----------|---------|-----------|----------|----------|
| (Intercept)         | 0.41     | 0.00    | 0.21      | 1.98     | .056     |
| ME condition        | -0.13    | -0.27   | 0.10      | -1.28    | .104     |
| MY condition        | -0.12    | -0.25   | 0.10      | -1.24    | .112     |
| MYE condition       | -0.05    | -0.10   | 0.12      | -0.39    | .350     |
| Total practice time | 0.00     | 0.03    | 0.00      | 0.14     | .893     |
| Age                 | -0.01    | -0.31   | 0.01      | -1.56    | .129     |
| Gender              | -0.13    | -0.23   | 0.09      | -1.48    | .149     |
| Occupation          | 0.29     | 0.45    | 0.14      | 2.16     | .038     |
| Baseline length     | -0.01    | -0.16   | 0.01      | -1.02    | .313     |

**Table S20**

*Regression Model for Tau-U Arousal Estimates as Dependent Variable and Component, Total Practice Time, Age, Gender, Occupation, and Baseline Length as Predictors (df = 33)*

| Variable                   | <i>b</i> | $\beta$ | <i>SE</i> | <i>t</i> | <i>p</i> |
|----------------------------|----------|---------|-----------|----------|----------|
| (Intercept)                | 0.32     | 0.00    | 0.20      | 1.58     | .123     |
| Ethical education (yes/no) | -0.03    | -0.08   | 0.08      | -0.41    | .344     |
| Physical yoga (yes/no)     | -0.03    | -0.07   | 0.08      | -0.39    | .350     |
| Total practice time        | 0.00     | 0.08    | 0.00      | 0.41     | .688     |
| Age                        | -0.01    | -0.29   | 0.01      | -1.40    | .171     |
| Gender                     | -0.14    | -0.25   | 0.09      | -1.55    | .131     |
| Occupation                 | 0.24     | 0.37    | 0.13      | 1.82     | .079     |
| Baseline length            | -0.01    | -0.15   | 0.01      | -0.96    | .345     |

**Table S21**

*Multilevel Regression Estimates for Arousal Scores as Dependent Variable and Time, Condition, Total Practice Time, Age, Gender, Occupation, and Baseline Length as Predictors*

| Variable             | $\beta$ | <i>SE</i> | <i>df</i> | <i>t</i> | <i>p</i> |
|----------------------|---------|-----------|-----------|----------|----------|
| Time                 | 0.00    | 0.03      | 2454      | 0.15     | .883     |
| ME condition         | -0.06   | 0.06      | 32        | -0.94    | .353     |
| MY condition         | 0.05    | 0.06      | 32        | 0.89     | .381     |
| MYE condition        | 0.07    | 0.08      | 32        | 0.92     | .363     |
| Total practice time  | 0.01    | 0.06      | 32        | 0.24     | .814     |
| Age                  | 0.08    | 0.06      | 32        | 1.18     | .247     |
| Gender               | -0.08   | 0.04      | 32        | -1.75    | .090     |
| Occupation           | -0.06   | 0.06      | 32        | -0.97    | .338     |
| Baseline Length      | 0.05    | 0.05      | 32        | 1.01     | .321     |
| Time * ME condition  | -0.03   | 0.04      | 2454      | -0.74    | .228     |
| Time * MY condition  | -0.02   | 0.04      | 2454      | -0.48    | .315     |
| Time * MYE condition | 0.01    | 0.04      | 2454      | 0.28     | .390     |

**Table S22**

*Multilevel Regression Estimates for Arousal Scores as Dependent Variable and Time, Component, Total Practice Time, Age, Gender, Occupation, and Baseline Length as Predictors*

| Variable                   | $\beta$ | <i>SE</i> | <i>df</i> | <i>t</i> | <i>p</i> |
|----------------------------|---------|-----------|-----------|----------|----------|
| Time                       | 0.00    | 0.03      | 2455      | 0.15     | .440     |
| Ethical education (yes/no) | -0.03   | 0.06      | 33        | -0.47    | .639     |
| Physical yoga (yes/no)     | 0.10    | 0.06      | 33        | 1.88     | .069     |
| Total practice time        | 0.02    | 0.06      | 33        | 0.34     | .738     |
| Age                        | 0.08    | 0.06      | 33        | 1.27     | .212     |
| Gender                     | -0.08   | 0.04      | 33        | -1.77    | .085     |
| Occupation                 | -0.07   | 0.06      | 33        | -1.18    | .248     |
| Baseline Length            | 0.05    | 0.04      | 33        | 1.06     | .297     |
| Time * Ethical education   | 0.00    | 0.03      | 2455      | 0.05     | .479     |
| Time * Physical yoga       | 0.01    | 0.03      | 2455      | 0.45     | .327     |

**Table S23***Frequencies of Categorized Affective Responses to the Treatment in Each Condition*

| Affective Response | MA | ME | MY | MYE | Sum |
|--------------------|----|----|----|-----|-----|
| More Energetic     | 2  | 4  | 2  | 5   | 14  |
| More Relaxed       | 0  | 3  | 1  | 3   | 7   |
| Less Stressed      | 1  | 1  | 1  | 0   | 3   |
| No Change          | 1  | 0  | 6  | 0   | 6   |
| More Stressed      | 6  | 3  | 0  | 3   | 12  |
